# Supplementary material for: Phytochemical Profile, Safety and Efficacy of a Herbal Mixture Used for Contraception by Traditional Health Practitioners in Ngaka Modiri Molema District Municipality, South Africa
Source: MDPI journal article supplement (doi:10.3390/plants11020193), 2022-01-12
Supplement: s1 [file s1]

### Supplementary Materials

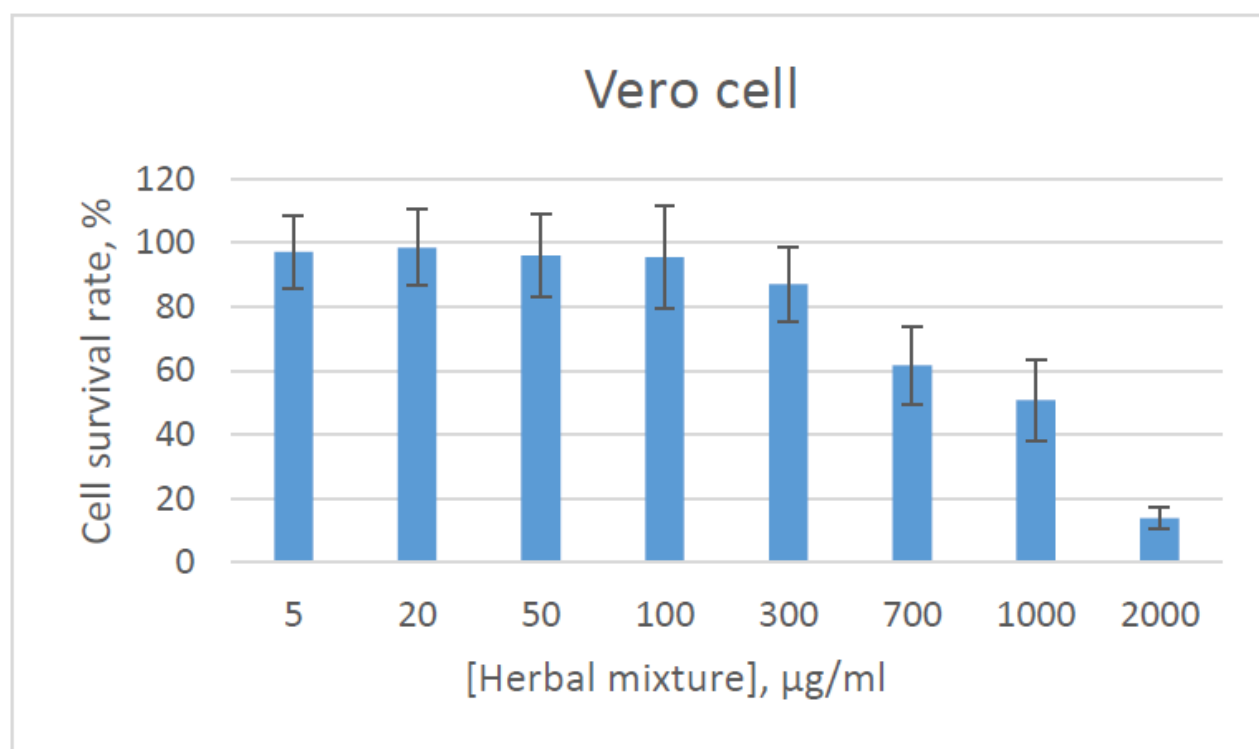

**Figure S1:** Cell survival (%) of Vero cells after 72 h treatment with herbal mixture based on 3-(4,5-dimethylthiazol-2-yl)-2,5-diphenyl tetrazolium bromide (MTT) assay. Values are mean, standard deviation, n =6
